# 1                    **Presence of a resident species aids invader evolution**

2    **Authors:** Josianne Lachapelle<sup>1</sup>, Elvire Bestion<sup>2</sup>, Eleanor E Jackson<sup>3</sup>, C- Elisa Schaum<sup>4</sup>

3

## 4    **Author affiliations:**

5    <sup>1</sup> Department of Biology, University of Toronto at Mississauga, 3359 Mississauga Road,  
6    William G. Davis Building, Mississauga, ON, L5L 1C6, Canada

7    <sup>2</sup> Station d'Ecologie Théorique et Expérimentale, UMR 5321 Université Paul Sabatier,  
8    Moulis, 09200, France

9    <sup>3</sup> School of Biological Sciences, University of Reading, Reading, UK

10    <sup>4</sup> Institute of Marine Ecosystem and Fishery Science, Centre for Earth System Research and  
11    Sustainability, Universität Hamburg, Olbersweg 24, 22767 Hamburg

12

13    **Correspondence should be addressed to:** [elisa.schaum@uni-hamburg.de](mailto:elisa.schaum@uni-hamburg.de)

14    **Key words:** Extinction, colonisation, invasion, plasticity, global warming, co-culture

15    **Number of words in abstract:** 212

16    **Number of words in main text** (without methods and references): 2900 (methods: 2800)

17

18

19

20 **Abstract**

21 Phytoplankton populations are intrinsically large and genetically variable, and interactions  
22 between species in these populations shape their physiological and evolutionary responses.  
23 Yet, evolutionary responses of microbial organisms in novel environments are investigated  
24 almost exclusively through the lens of species colonising new environments on their own,  
25 and invasion studies are often of short duration. Although exceptions exist, neither type of  
26 study usually measures ecologically relevant traits beyond growth rates. Here, we  
27 experimentally evolved populations of fresh- and seawater phytoplankton as monocultures  
28 (the green algae *Chlamydomonas moewusii* and *Ostreococcus tauri*, each colonising a novel,  
29 unoccupied salinity) and co-cultures (invading a novel salinity occupied by a resident  
30 species) for 200 generations. Colonisers and invaders differed in extinction risks, phenotypes  
31 (e.g. size, primary production rates) and strength of local adaptation: invaders had  
32 systematically lower extinction rates and broader salinity and temperature preferences than  
33 colonisers – regardless of the environment that the invader originated from. We emphasise  
34 that the presence of a locally adapted species has the potential to alter the invading species’  
35 eco-evolutionary trajectories in a replicable way across environments of differing quality, and  
36 that the evolution of small cell size and high ROS tolerance may explain high invader fitness.  
37 To predict phytoplankton responses in a changing world, such interspecific relationships need  
38 to be accounted for.

39

## 40 **Introduction**

41

42 Ecology and evolution affect invader success and native species' responses, and in a  
43 warming, changing world, invasion scenarios are likely to become more frequent [1-3]. Eco-  
44 evolutionary studies on biological invasions for microbial populations are arduous to carry  
45 out - especially when encompassing an element of tracking evolutionary responses in real  
46 time for species less cultivable than bacteria ( e.g. [4]), and are accordingly rare (but see e.g.  
47 [5,6])

48

49 When the survival of an organism – including invaders, colonisers, and resident species -  
50 hinges largely on physiological short-term responses, they can cope with a changed or  
51 changing environment through phenotypic plasticity. There, a given genotype produces a  
52 different phenotype in response to changes in the abiotic or biotic environment [7]. In  
53 asexually dividing microbes, these plastic responses occur within a single or a few  
54 generations and unless the new environment is lethal to most individuals in a sufficiently  
55 diverse population, it is unlikely that selection acts through sorting on such short time-scales.  
56 In clonal populations – the standard scenario in many laboratory experiments - evolution  
57 through *de novo* mutations is similarly rare on such short time-scales [8,9].

58

59 In the long term, the speed at which genetic sorting can affect the mean population trait in a  
60 diverse population depends on the amount of standing genetic variation, the strength of  
61 selection, and the size of the population [10,11]. Both plasticity and changes in allele  
62 frequency contribute to the magnitude and direction of an organism's response to a novel  
63 environment. In aquatic microbes, short- and long-term responses to environmental change  
64 have been extensively studied in single isolate experiments (e.g. e.g. [12-15]). Far fewer  
65 studies consider ecologically complex environments [16-19]. Studies that have tested how

66 species interactions evolve are traditionally carried out in environments that are of low  
67 quality for the focal species (traditionally low-nutrient or toxic environments), i.e. in  
68 environments that lead to slower growth and a drastic and near-fatal decline in population  
69 size of the focal species [8,20].

70

71 Under circumstances where resources are scarce, competition is often the main type of  
72 interaction [21-23]. Whether competition can then help or hinder evolution is highly context-  
73 dependent: Competition can explain changes in lineage or species frequencies as a function  
74 of the environment (e.g. light, nutrients, temperature) [24], but interactions between microbes  
75 need not be solely competitive and can range from competition to facilitation to mutualism  
76 to interdependence and combinations thereof [25-27], especially when environmental change  
77 is not leading to a decrease, but an increase in growth rate [28]. While the breadth of  
78 interactions is well understood in ecology [29-31], today's models, when considering how  
79 microbes behave in a changing world, largely assume that interactions be competitive in  
80 nature [32]. Finally, these models are increasingly incorporating traits (and changes therein)  
81 other than growth rates, such as cell size and carbon fixation. Those traits are not routinely  
82 monitored in most selection experiments, where the focus tends to be on growth rates.

83

84 Here, we used an experimental evolution approach to conceptually investigate if coloniser or  
85 invader status changes an organism's chances of survival in a new salinity and whether these  
86 dynamics differ between short- term (a few generations) and long-term (~200 generations)  
87 responses under otherwise non-limiting conditions. We define colonisers as a species moving  
88 into a novel environment that is unoccupied (an ecologically rather unlikely scenario, but  
89 standard in most selection experiments), and invaders as species moving into a novel  
90 environment where local species are present. We used two green algae, the freshwater

91 phytoplankton *Chlamydomonas moewusii* and the marine picoplankton *Ostreococcus tauri*.  
92 Both genera of green algae are cosmopolitan in natural systems and established model  
93 organisms for long-term studies in experimental evolution [33-35] . We evolved all  
94 populations for *ca* 200 generations either alone or in co-culture, in freshwater and marine  
95 conditions (Figure 1). To test whether differences between colonisers and invaders are  
96 general and repeatable in environments favouring faster growth, we superimposed a full-  
97 factorial temperature treatment, where all invaders and all colonisers were grown at 22°C (the  
98 culture ‘control’ temperature) , 26°C (mild warming, and constituting a ‘better’ , favourable  
99 environment where growth is faster and stress is lower), 32°C (extreme warming, constituting  
100 a ‘worse’, unfavourable environment, where growth is reduced and stress is higher), and a  
101 fluctuating temperature treatment, where temperature cycles between 22°C and 32°C every 3-  
102 5 generations (constituting a ‘better’ , ‘favourable’ environment). The temperatures were  
103 chosen based on pilot studies examining the temperature tolerance curves of each species (see  
104 supporting information). We show that across all environments, freshwater and marine  
105 invaders fare better than colonisers, that samples selected under the invasion scenario evolve  
106 more generalist tendencies than samples selected as colonisers in the same environment, and  
107 that organisms in the invasion scenario evolve significantly different phenotypes compared to  
108 those in the coloniser scenario.  
109

## 110 **Results**

### 111 **Extinction risk is lower for invaders than for colonisers**

112 Rapid changes in salinity can reduce the probability of phytoplankton survival and may limit  
113 population sizes to a point at which evolutionary adaptation becomes increasingly unlikely  
114 [36,37]. In our case, populations of all surviving cultures remained large enough to supply  
115 mutations and avoid drift at *ca*  $10^5$  cells mL<sup>-1</sup>, which ensures a large enough supply of  
116 mutations for an evolutionary response, and makes differences between colonisers' and  
117 invaders' or different species' responses in the long-term likely to be independent of  
118 population size.

119

120 Extinction rates in a new salinity were lower in invading than colonising phytoplankton (in a  
121 novel salinity, invading *Chlamydomonas* were two thirds less likely to go extinct than  
122 colonising *Chlamydomonas*, and for invading *Ostreococcus*, the likelihood of extinction was  
123 halved compared to colonising *Ostreococcus*, survival analysis:  $z = -2.90$ ,  $P = 0.0037$   
124 Supporting Tables 1 and 2). Extinction events occurred early on in the experiments (within  
125 the first 70 generations,  $z = -4.13$ ,  $P = 3.6 \times 10^{-5}$ ; Fig. 2; Supporting Table 1 and 2,  
126 Supporting Figure 1), with no further extinctions after 100 generations. After the first ~ 70  
127 generations, population sizes in all surviving invader cultures stabilised and were no longer  
128 statistically different from colonisers ( $F_{1,2} = 1.72$ ,  $p = 0.32$ ; more details in Supporting  
129 Tables 3 to 4).

130

131 70 -100 generations is a time-frame corresponding roughly to a single growing season of fast-  
132 growing green algae, and is comparable to other marine microbial experiments where  
133 evolution occurred on the scale of just below 100 to a few 100 generations [13,15,38], though  
134 as few as two generations have been reported to suffice for an evolutionary response [39].

135 Theory predicts that evolutionary potential should be high in good quality environments  
136 leading to an increased or unchanged fitness, and that extinction risk should be low in  
137 environments that fluctuate predictably (e.g. [40]). We found that extinctions were indeed  
138 overall lowest in the ameliorated environments, i.e. under mild warming at 26°C, and in the  
139 fluctuating environment (survival analysis:  $z = -1.22$ ,  $P = 0.043$ ; Supporting Figure 1,  
140 Supporting Table 2). *Ostreococcus* colonisers had a small but significant (see Supporting  
141 Table 2) advantage over *Chlamydomonas* colonisers, with higher survivability over all. While  
142 we cannot determine the mechanism by which co-culture favours survival, or whether  
143 *Ostreococcus* are per se better colonisers than *Chlamydomonas* (Fig. 2 and Supporting Table  
144 2), we can begin to quantify the effects of abiotic environment and species interactions on  
145 evolutionary and short-term responses.

146

#### 147 **Invaders and colonisers differ in salinity and temperature tolerances**

148 Survival is insufficient: Once extinction is no longer one of the main mechanisms driving  
149 responses, we need to know the performance of the population across environments, and the  
150 phenotypes they might display. To integrate plastic and evolutionary responses into  
151 ecosystem [41] and individual-based models [42], and to better understand the dynamics in  
152 laboratory experiments [43] knowledge of phenotypic traits and organismal biology is  
153 needed. Here, colonisers differed from invaders in the magnitude of their evolutionary  
154 response, their ability to grow in their ancestral environments, and in the phenotypes they  
155 evolved.

156

157 When colonisers were transferred back into their ancestral salinity, their growth rates were  
158 the same as or lower than they had been in that same salinity before evolution in a novel-  
159 salinity environment (e.g. average growth rate per day of the coloniser in the novel salinity

160 after evolution in novel salinity:  $1.13 \pm 0.02$  SEM, and after transfer back into the ancestral  
161 salinity:  $0.79 \pm 0.02$  SEM, Fig. 3, Supporting Tables 5 and 6 for more details). Growth rates  
162 of invaders were overall higher, and did not decrease significantly upon being transplanted  
163 back into their ancestral salinity (average growth rate of the invader in the novel salinity after  
164 evolution in novel salinity:  $1.31 \pm 0.01$  SEM, and after transfer back into the original  
165 salinity:  $1.29 \pm 0.01$  SEM). Invaders and colonisers also differed with regards to their  
166 responses to warming (supporting Tables 7 and 8 for details), where invaders again  
167 outperformed colonisers. This pattern was exacerbated under mild warming in 26°C where  
168 invader growth rates were on average 1.3 times higher than coloniser growth rates (tukey post  
169 hoc,  $P < 0.001$ ), and under the fluctuating treatment, with an average fold increase of invaders  
170 vs colonisers of 1.2 (tukey post hoc,  $P < 0.001$ ). The most pronounced advantage of invaders  
171 over colonisers was at the selection temperature (Fig. 4 A, Supporting Tables 7 and 8).  
172 Growth rates were diminished under environmental deterioration at 32° C, and this decrease  
173 in growth was the least pronounced in invading species (Fig. 4A). We find support that in the  
174 unfavourable environments (high temperature, changed salinity), intracellular reactive  
175 oxygen species (ROS) production is higher, and ROS tolerance impeded, but that this effect  
176 is more pronounced in colonisers than invaders (Supporting Figures 2 and 3).

177

### 178 **Phenotypic traits of colonisers and invaders**

179 Cell size overall declined with selection temperature regardless of selection regime or  
180 species. *Ostreococcus* was more reactive to temperature than *Chlamydomonas* overall  
181 (Supporting Figure 4, Supporting Tables 9 and 10), and whether the species was invading or  
182 colonising also had an impact on the focal species' cell size (Supporting Tables 9 and 10,  
183 Supporting Figure 4), with smaller invaders than colonisers. Cell size of *Chlamydomonas*  
184 was more likely to change in response to a resident species than cell size of *Ostreococcus*,



185 with *Chlamydomonas* cells up to 1.43 fold smaller after evolution invading the marine  
186 species in saltwater than after colonising saltwater on their own (also Figure 4B).

187

188 While we cannot disentangle the relative contributions of the individual species to Net  
189 Photosynthesis rates in the co-cultures (NP, i.e. rates of photosynthesis after respiration has  
190 been accounted for), net-photosynthesis per gram carbon of evolved co-cultured samples was  
191 on average 13% higher than expected from the NP of the same two species at the same  
192 salinity in monoculture in line with over-yielding observed in other species [44] (Supporting  
193 Figure 5, and Supporting Tables 11 -14). The same pattern emerged when we assayed the  
194 same species at the same salinity after decomposition of the co-cultures into monocultures  
195 (e.g. physically separating a former mixed culture of *Chlamydomonas* residents and  
196 *Ostreococcus* invaders into monocultures (Supporting Tables 11 -14)).

197

### 198 **Experimental community decomposition**

199 Experimentally separating ('decomposing') the evolved co-culture samples into  
200 monocultures yielded insights into how strongly the invaders had adapted to the presence of  
201 the resident species, and what effect the invader had on the growth of the resident species  
202 (see methods for details). In samples that had only lived in co-culture for two transfers (<20  
203 generations), growth after decomposition was indistinguishable from growth in mono-  
204 cultures at the same salinity and temperature (Supporting Table 15, Supporting Figure 6). In  
205 contrast, in samples that had lived in co-culture for ~200 generations, growth of the invading  
206 species when assayed alone in the selection salinity was reduced by up to 30% compared to  
207 when assayed in co-culture (Supporting Figure 7), and compared to the same species evolved  
208 in mono-culture at the same salinity/temperature regime. Of the resident species,  
209 *Ostreococcus* selected in co-culture with *Chlamydomonas* showed evidence of a marked

210 decrease in growth when the invading *Chlamydomonas* was removed. Resident  
211 *Chlamydomonas* grew faster when the invading *Ostreococcus* population was removed, with  
212 no significant effect of temperature on this pattern.

213

214 In the decomposed samples, patterns in net primary production of former invaders mirrored  
215 the patterns found in growth rates: invaders always photosynthesised less after decomposition  
216 than the same species evolved in monoculture in the same selection salinity. High  
217 photosynthesis rates in formerly invaded *Chlamydomonas* were in line with higher growth  
218 rates in formerly decomposed *Chlamydomonas* (Supporting Tables 11-14, Supporting Figure  
219 7). The resident species *Ostreococcus* photosynthesised more after decomposition than when  
220 evolved in monoculture - but grew more slowly. The higher NP rates were, at least for the  
221 duration of the assay (two weeks), not directly channelled into growth, indicating that the  
222 presence of other species may explain hitherto often observed but poorly explained variations  
223 in growth rates in more complex systems (but see [16,45]). We found that samples with the  
224 highest surplus NP (or least increase in growth) had a tendency to have higher Nile Red  
225 fluorescence, indicating higher lipid storage (Supporting Figure 8). Similar responses  
226 including high rates of NP but suppressed growth can be achieved by merely spiking  
227 *Ostreococcus* and *Chlamydomonas* cultures with water conditioned by the other species  
228 (Supporting Figure 9).

229

## 230 **Discussion and Conclusions**

231 Rapid adaptation to a novel salinity or the evolution of salinity tolerance are major driving  
232 forces in determining the distribution and phenotypic characteristics of phytoplankton  
233 communities [46-50]. Changes in salinity (IPCC, 2014), particularly in combination with  
234 elevated temperatures, have the potential to impact the phenotypic characteristics of

235 phytoplankton species, the communities they populate, and the role of phytoplankton species  
236 on aquatic food webs and global nutrient cycles [48,50,51]. Here, we found that species  
237 *colonising* a new salinity were prone to extinctions, but that survivors rapidly became locally  
238 adapted to their novel salinity. Rapid evolution to a novel salinity has been proven before  
239 [34,52], but evolution as a single species might not be a common ecological scenario, as  
240 species are likely to not arrive in a new environment and find it unoccupied. Species *invading*  
241 a new salinity were less likely to go extinct and evolved high tolerance to both fresh and  
242 saltwater, especially under environmental amelioration, such as mildly elevated or rapidly  
243 fluctuating temperatures. Invaders had higher survival and growth rates, and were also  
244 characterised by overall smaller cell size, lower reactive oxygen species (ROS) production,  
245 higher ROS tolerance, and a tendency to store lipids. ROS are a natural by-product of cellular  
246 metabolism, but can damage the cell at high quantities [53]. Therefore, higher tolerance  
247 toward or lower quantities of ROS may infer a fitness benefit [54]. Taking into account  
248 growth rates across all temperature treatments, the invader became more of a generalist, with  
249 better performance across multiple environments. Successful invading species often have  
250 traits associated with generalists (see e.g. [55,56]), but whether generalist traits enable  
251 successful invasions or whether organisms evolve to have more generalist traits as a  
252 consequence of invasions remains an open question.

253

254 Our results suggest that under warming and increased climate variability, invasions through  
255 small, warm-adapted taxa with intrinsically elevated metabolic and growth rates may become  
256 more frequent (‘tropicalisations’, see [57,58]), with high-unpredictable consequences on  
257 aquatic ecosystems as a whole. As changes in fitness, cell size and metabolic activity are  
258 often linked [59,60], it stands to reason that one possible mechanisms for higher invader  
259 fitness in our invader samples lies in their ability to rapidly down-regulate cell size [61-63],

260 which in turn might be what is giving rise to their ability to better handle reactive oxygen  
261 species [54,62] (Figure 4B and Supporting Figure 10 – the smallest cells had highest fitness  
262 and were better able to detoxify ROS). The dynamics and mechanisms of increasing fitness  
263 under constant directional selection are well understood [64,65], and experimental evolution  
264 lends itself well to linking environmental cause to evolutionary effect, but it is limited in  
265 accurately deciphering the mechanisms that underlie trait evolution. Strategies that increase  
266 fitness can vary over time [9] and when there are multiple genotypes in a population,  
267 evolutionary trajectories, as well as the traits evolved will depend on the environment as well  
268 as the genotype [39]. Due to the complex nature of fluctuating selection regimes, barring  
269 further analyses, for example on the level of the transcriptome, we cannot with certainty  
270 elucidate the exact mechanism that allows for the evolution of these strikingly different  
271 phenotypes in invasion *vs.* colonisation scenarios. Still, *Ostreococcus* selected in co-culture  
272 with *Chlamydomonas* showed evidence of a marked decrease in growth when the invading  
273 *Chlamydomonas* was removed, suggesting that interactions were mutualistic or facilitating in  
274 nature. *Chlamydomonas*, when *Ostreococcus* were removed, did *not* show a marked decrease  
275 in growth, making it seem likely that the fact of being an invader had direct phenotypic and  
276 fitness consequences regardless of the nature of the interaction.

277

278 Understanding the impacts of environmental change over evolutionary timescales will require  
279 that we experimentally investigate the mechanisms underlying the differences between  
280 colonisers and invaders, the direct effects of rising temperatures on species interactions, and  
281 the indirect reciprocal feedbacks between ecological and evolutionary dynamics  
282 [29,30,66-68].

283

284 **Acknowledgments**

285 This study was funded by a British Ecological Society ‘small grant’ to ES (BES 5705 / 6749).  
286 *Ostreococcus* samples were kindly provided by Samuel Barton and Sarah Heath.  
287 *Chlamydomonas* samples were sourced by EB. Pilot studies were carried out by ES and JL at  
288 the University of Edinburgh, where Nick Colegrave and Sinéad Collins provided bench space  
289 and equipment. Gabriel Yvon-Durocher provided bench and incubator space for the main  
290 experiment at the Environment and Sustainability Institute in Penryn, UK. The authors thank  
291 Etienne Low-Decarie and Georgina Brennan for comments that greatly improved the  
292 manuscript, and Stefanie Schnell for maintaining the cultures in Hamburg.  
293

294 **Author contributions:** ES and JL conceived and designed the experiment and wrote the  
295 manuscript. ES, EB, and EJ carried out experiments, and ES supervised laboratory work. JL  
296 and ES analysed data, and all authors contributed to writing the manuscript.  
297

298 The authors declare no conflict of financial or other interest, and all data will be made  
299 available on zenodo or data dryad upon acceptance. During the pre-print stage data are  
300 available from the authors upon request.

**A Treatment overview**

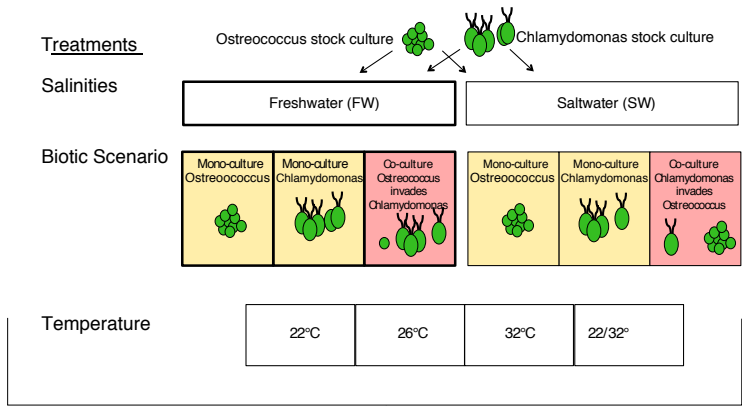

2 species in 3 biotic treatments and 4 temperatures in full interaction, with n=8 in each unique environment. Cultures were maintained at these conditions with regular transfers.

**B Reciprocal transplant example 1**

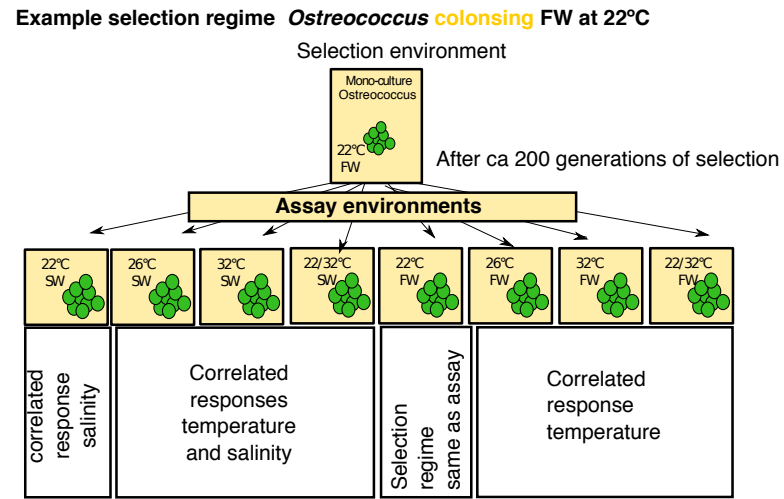

**C Reciprocal transplant example 2**

**Example selection regime *Chlamydomonas* invading SW  
*Ostreococcus* at 26°C**

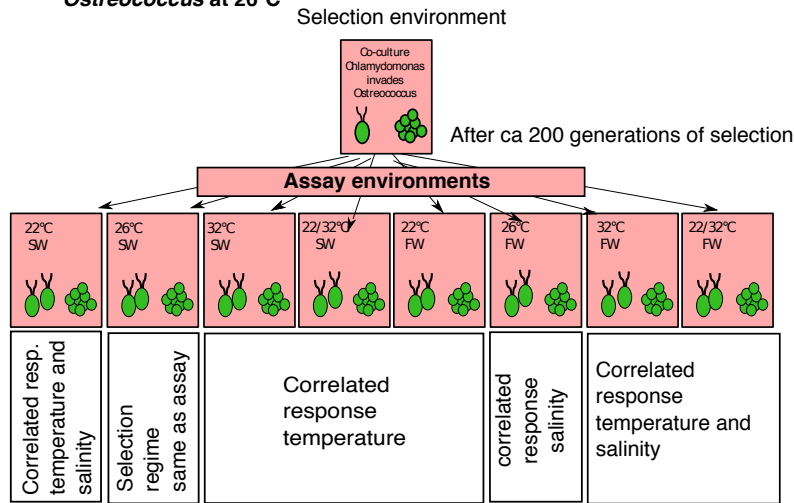

**D Decomposition example**

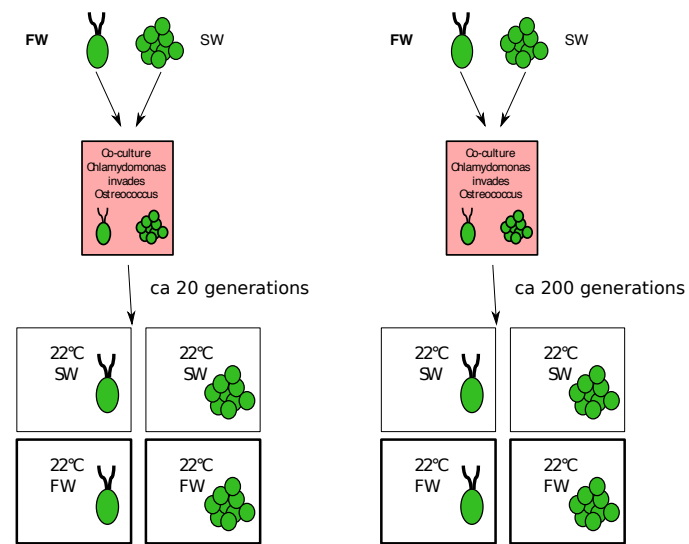

302

303

304 **Figure 1: Experimental set-up.** Throughout colour indicates the biotic scenario (yellow for colonisation, red for invasion), and the thickness of  
305 frames, the salinity (thick for freshwater and thin for salt water) **A) Treatment overview** Stock cultures of the marine *Ostreococcus* and the  
306 freshwater *Chlamydomonas* were used to inoculate two salinity regimes (a freshwater, FW, and a saltwater treatment, SW), crossed with three  
307 biotic experiments (*Ostreococcus* in monoculture, *Chlamydomonas* in monoculture, or co-culture with *Ostreococcus* invading *Chlamydomonas*  
308 and *vice versa*), and four temperature regimes (22°C as the control, 26°C as moderate warming, 32°C as extreme warming, and a variable  
309 environment where temperature cycled between 22°C and 32°C twice weekly, for a total of 24 unique selection environments. n=8 for each  
310 unique combination of salinity, biotic, and temperature regime. Samples were propagated weekly by batch transfer for approximately 200  
311 generations. Light yellow denotes *Ostreococcus* or *Chlamydomonas* in mono-culture, i.e. the focal species is colonising. Light red denotes  
312 samples grown in co-culture. There, the focal species is invading. **B and C) example reciprocal assay** At the end of the experiment, all samples  
313 were assayed in all salinity and temperature treatments. **D) Decomposition of evolved samples:** Further, samples evolved in co-culture were  
314 decomposed into two separate monocultures and then assayed at both salinities at their selection temperature to test whether samples had  
315 evolved to depend on each other.

316

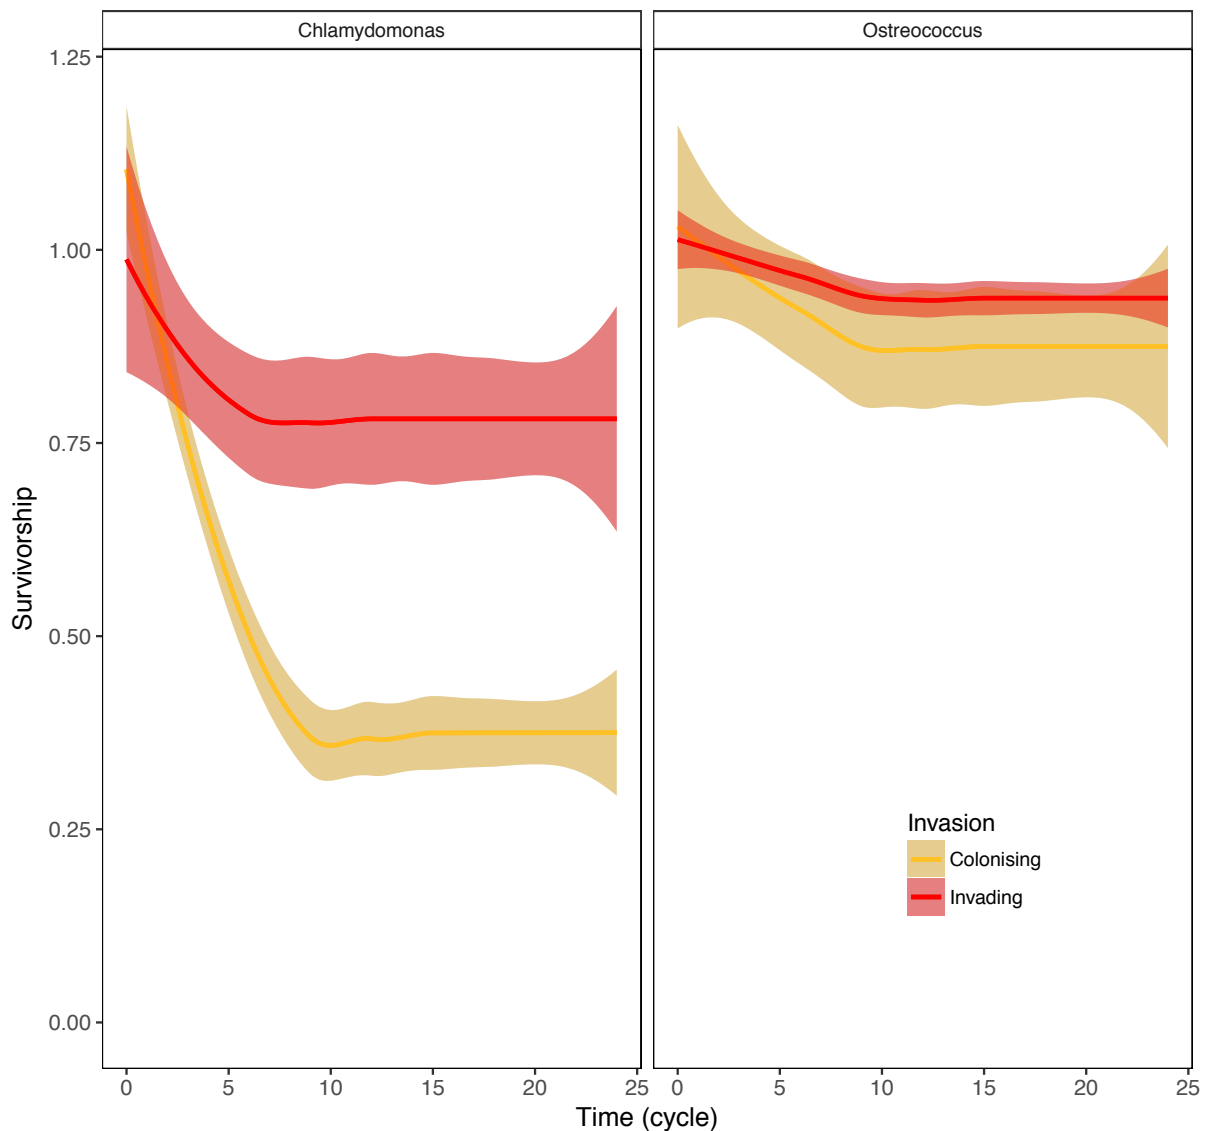

317

318 **Figure 2: Survival when invading into a novel salinity from rare is enhanced in the presence of a**  
319 **resident species across all selection regimes.** Displayed is the mean survivorship for samples in all  
320 temperature regimes over time (where one cycle or transfer corresponds to one week), with 1.0 as 100% of  
321 populations surviving, and shaded areas denoting 95% confidence intervals. All treatment combinations  
322 started with N = 8. The proportion of populations and replicates surviving decreased rapidly at the  
323 beginning of the experiment but levelled off after about 10 transfers as extinctions stopped. The number of  
324 surviving biological replicates at the end of the experiment is shown in Table S1. Invader trajectories in  
325 red, coloniser trajectories in yellow.

326

327



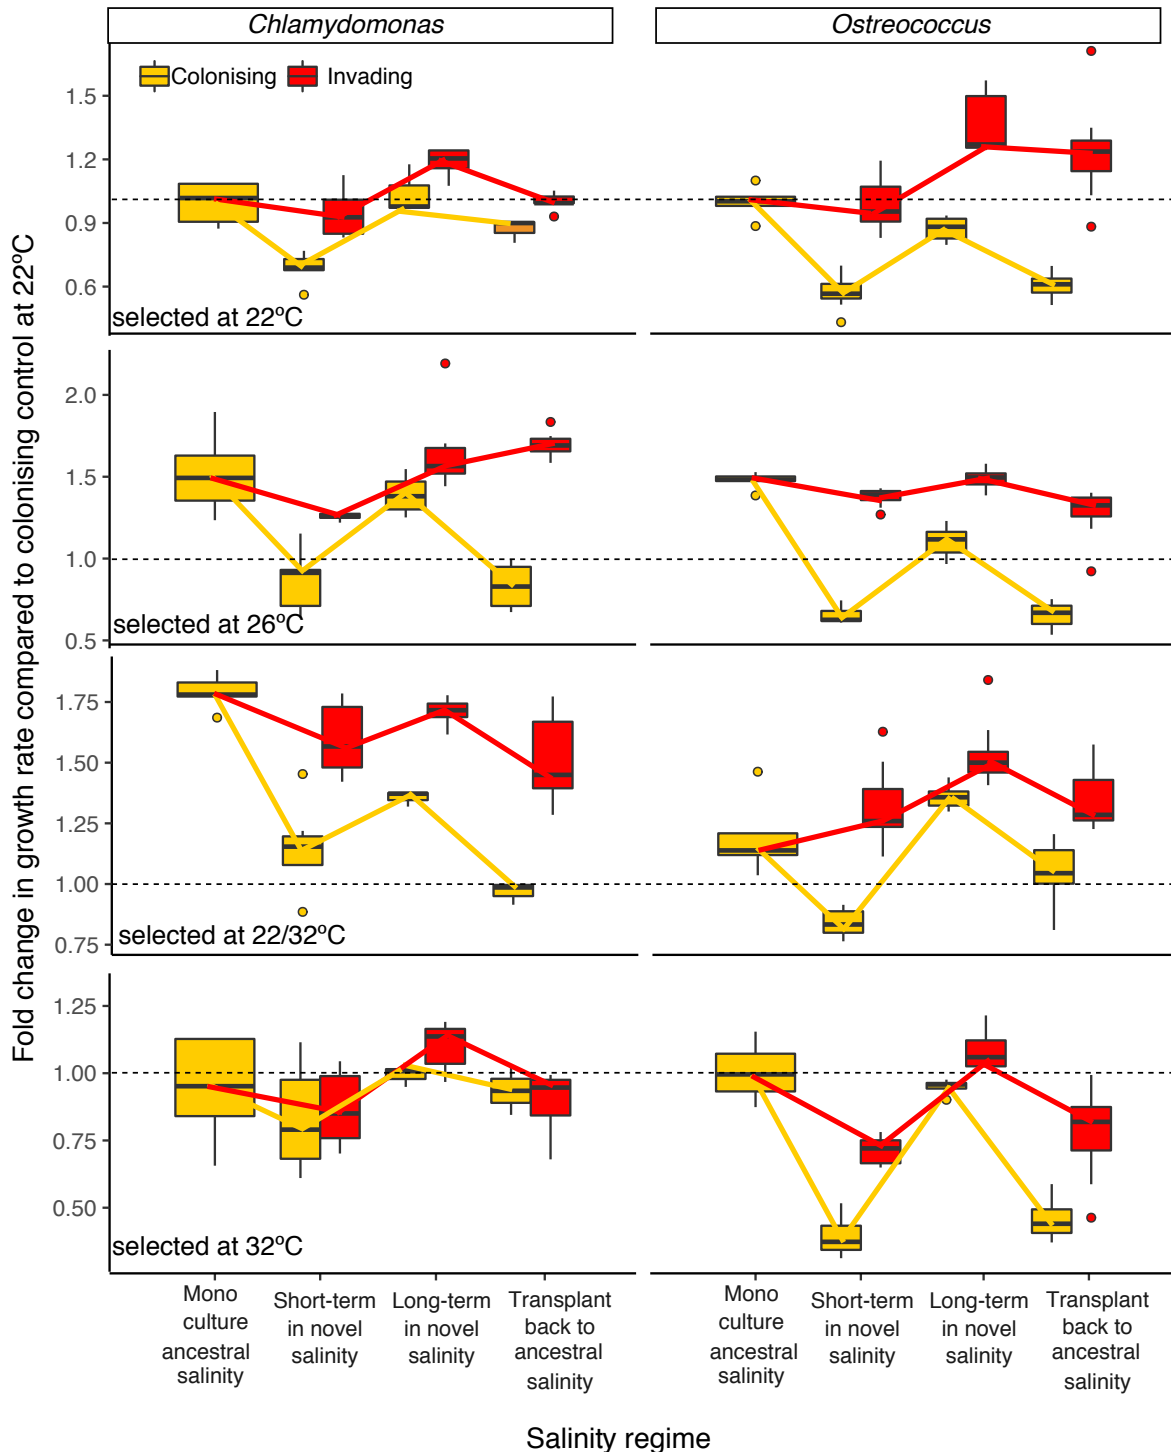

328

329 **Figure 3: Invaders and colonisers differ in their responses to salinity regimes across time scales.**  
 330 Salinity regime ‘Mono-culture ancestral’ denotes that the species was assayed in its ancestral salinity in  
 331 mono-culture after evolution in the ancestral salinity in mono-culture. ‘Short-term in novel salinity’ is for  
 332 growth rates measured after the sample had spent two transfers in the novel salinity. ‘Long-term in novel  
 333 salinity’ is the growth rate of the sample in the salinity that it was evolving in. ‘Transplant back to  
 334 ancestral is for growth rates measured when samples were transferred back into the ancestral environment  
 335 after evolution in the novel salinity. We express changes in growth as compared to *Ostreococcus* or  
 336 *Chlamydomonas* in its home salinity at 22°C in mono-culture, i.e. values < 1 (below dotted line) indicate  
 337 that a sample grew more slowly than the same species in mono-culture, in its home salinity at 22°C, and

338 values  $> 1$  (below dotted line) indicate that they grew faster. Each panel is for one selection temperature.  
339 Orange boxplots are for colonising species, and red, for invaders. See Table S2 for details on n per  
340 treatment. Boxplots are displayed as is standard, with the belt indicating the median. Fitted lines are for  
341 visualisation.  
342  
343

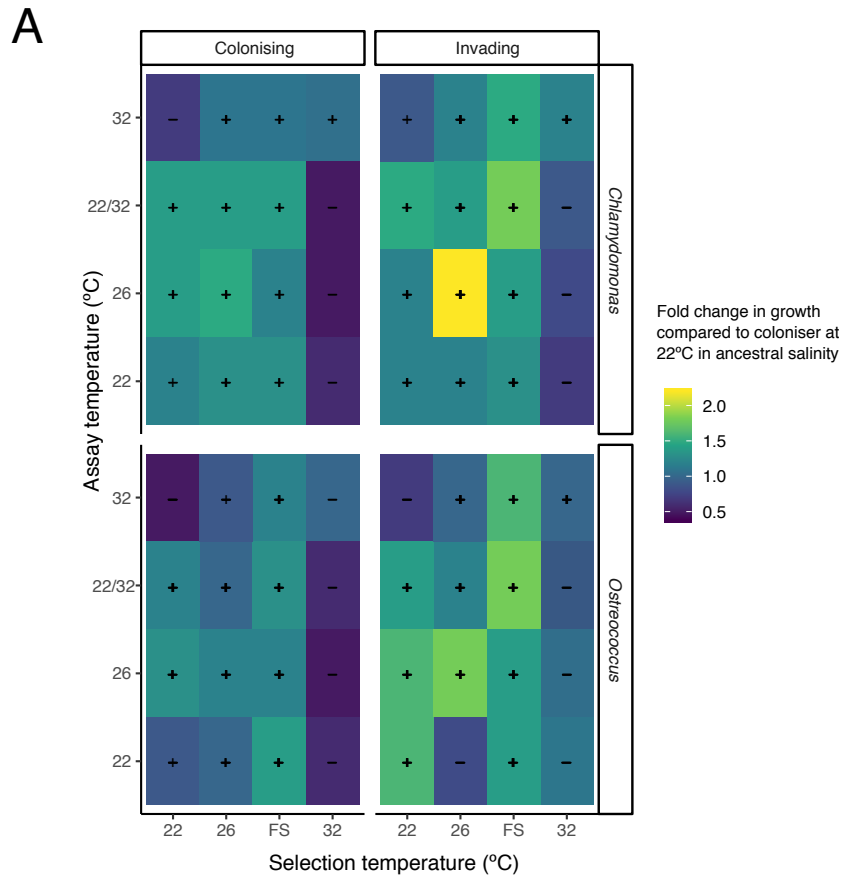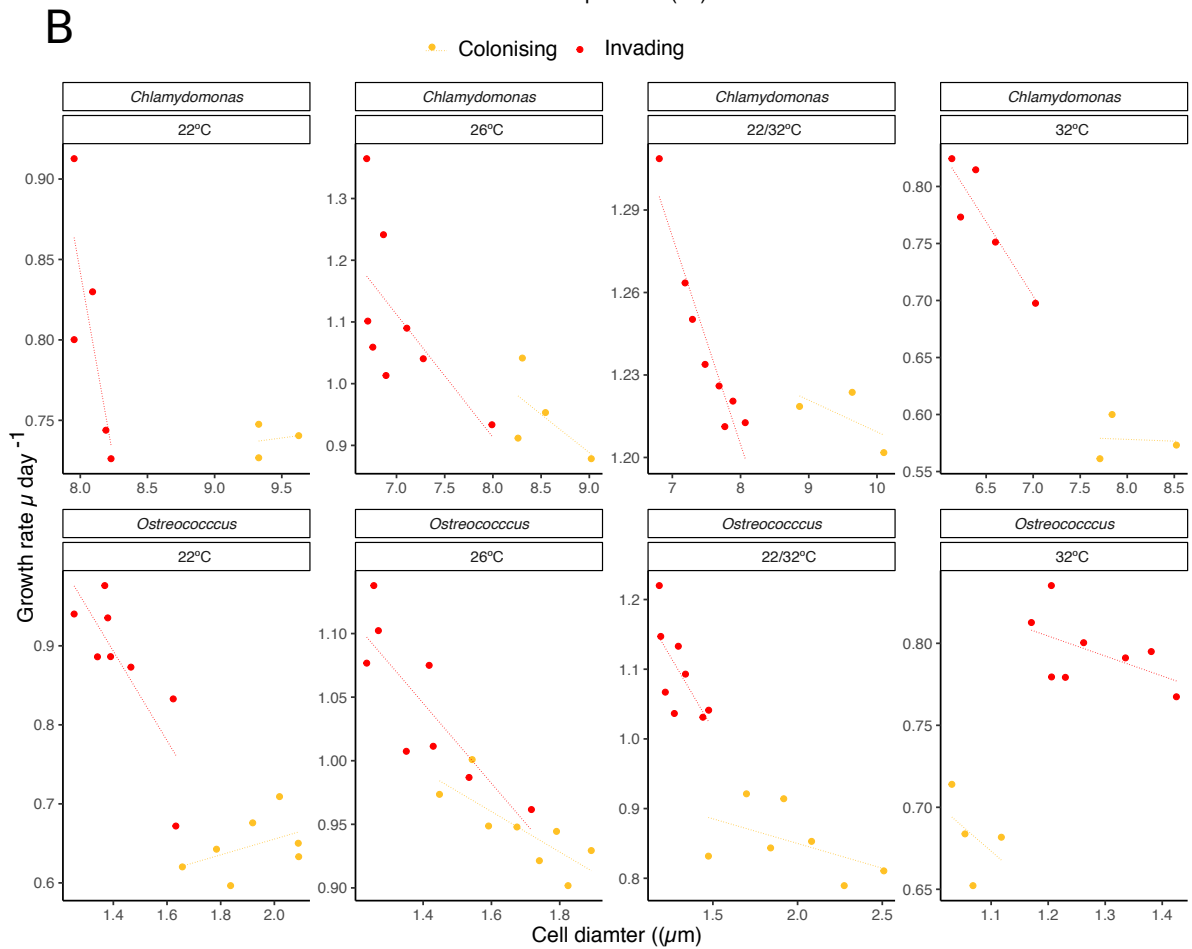

345 **Figure 4: Invaders fare better than colonisers in deteriorated (e.g. 32°C degree) and**  
346 **ameliorated (e.g. 26°C) environments. Invaders evolve small cells, yielding higher**  
347 **growth.** Visualisation of reciprocal temperature assays for colonisers and invaders. A: Tiles  
348 indicate whether the response to the assay condition (y axis) of invading and colonising  
349 cultures selected at a specific temperature (x axis) was to grow more slowly (purple hues) or  
350 faster (green and yellow hues) than the coloniser at 22°C in the ancestral salinity. B: Within  
351 each regime (invasion –red, or colonisation – orange), invaders tend to have smaller cells.  
352 Smaller cell size is associated with faster growth (and higher ROS tolerance, as well as lower  
353 ROS production, see Supporting Figure 11). Number of replicates varies due to treatment  
354 specific differences in extinction probability.

355  
356

357

## 358 **Methods**

359 **Should the methods exceed the allowed number of pages, we will provide a methods**  
360 **summary here, and the detailed methods, in the supporting information.**

361

### 362 **Algae strains**

363 The marine picoplankton *Ostreococcus tauri* (clone of the original OTH95) and the  
364 freshwater alga *Chlamydomonas moewusii* (CCAP 11/5B) were sourced as non-axenic stock  
365 cultures from the Roscoff culture collection and the CCAP (Culture Collection of Algae and  
366 Protozoa) respectively. The fact that these two species do not usually co-occur in nature is  
367 not problematic here because species invasion is the result of a new species being introduced  
368 into a new environment with resident species it has not interacted with before.

369 Pilot studies revealed that long-term growth was impoverished upon removal of the  
370 associated bacterial component or after antibiotic treatment, and thus no further attempts at  
371 using axenic cultures were made for the purpose of this study. The total amount of bacterial  
372 co-inhabitants was tracked and did not change throughout the experiment. Samples were  
373 maintained in semi-continuous batch culture (i.e. a fixed volume of exponentially growing  
374 cells was transferred into fresh medium at regular intervals) at 22°C, 100µmol quanta\*s<sup>-1</sup>\*m<sup>-2</sup>  
375 under a 12:12 hour light:dark cycle in INFORS™ multitron incubators with integrated

376 shakers until use. *Ostreococcus* was grown at a salinity of 32 (PSU, roughly 30g NaCl\*l<sup>-1</sup>;  
377 referred to from now on as saltwater or SW) in f/2 media [69], *Chlamydomonas* in modified  
378 Bold's media (roughly 0.025g NaCl\*l<sup>-1</sup>; referred to from now on as freshwater or FW).  
379 Concentrations of major nitrogen and phosphorus sources were the same in the fresh- and  
380 saltwater media.

381

### 382 **Selection experiment**

383 We set up our experiment using two salinity regimes (saltwater and freshwater, where we  
384 refer to the salinity that the species originated from as the 'ancestral' salinity) and three biotic  
385 regimes (two monoculture, and one co-culture scenario; Figure 1A). Residents are species  
386 evolved in their ancestral salinity (i.e. *Chlamydomonas* in freshwater, *Ostreococcus* in  
387 saltwater) either in mono-culture or in co-culture with an invading species. Invaders are  
388 species evolved in a novel salinity where the resident species is present (i.e. *Chlamydomonas*  
389 invading *Ostreococcus* in saltwater, *Ostreococcus* invading *Chlamydomonas* in freshwater).  
390 Finally, colonisers are species evolved in a novel salinity as a mono-culture (i.e. *Ostroeoccus*  
391 in freshwater, and *Chlamydomonas* in saltwater).

392 In pilot studies, we characterised temperature reaction curves for each species at each  
393 salinity. Temperature/salinity combinations that lead to a significant decrease in growth rate  
394 in the short-term compared to the coloniser in its ancestral salinity at 22°C were called 'low'  
395 quality or 'unfavourable environments. Thermal environments where growth rate increased  
396 were called 'high' quality or 'favourable' environments (here, these are the 26°C and  
397 fluctuating environment – this is also reflected in samples' abilities to deal with reactive  
398 oxygen species). Based on these pilot studies, the long-term experiment was replicated across  
399 four different temperature regimes, for a total of 24 unique treatments (x 8 biological  
400 replicates = 192 cultures, Figure 1A). The temperature regimes consisted of a fluctuating

401 temperature treatment and three stable temperatures, encompassing a stable ambient 22°C  
402 treatment (control), a stable 32°C treatment (severe warming), and a stable 26°C treatment  
403 (mild warming). In the fluctuating temperature treatment, temperature was switched between  
404 22°C and 32°C .ca every 3-5 generations.

405

406 We expect the first adaptive step to occur more rapidly in genetically diverse starting  
407 populations than in clonal populations, and have leveraged this in our study by starting with  
408 genetically diverse rather than clonal populations. [70]

409

410 All cultures started out as mono-cultures before invading species were added. Cultures were  
411 grown on 48-well plates with sterile, breathable membranes (Aeraseal™, Sigma-Aldrich) to  
412 minimise uneven evaporation and air exchange across plates. Monocultures were initially  
413 inoculated with 100 cells of *Chlamydomonas* or 1000 cells of *Ostreococcus* to account for the  
414 difference in cell size. In co-cultures, the resident species were inoculated at 100 fold the  
415 biomass of the invading species, for an ‘invading from rare’ scenario at the beginning of the  
416 experiment. The invasion event occurred only once at the beginning of the experiment, after  
417 which we tracked the fate of the invaders throughout the experiment. The 48-well plates were  
418 positioned randomly in the incubator, and their position was changed every other day to  
419 minimise location effects. Cultures were maintained in semi-continuous batch culture, where  
420 well-mixed samples of 200µl were serially transferred into 1200µl of new media every 7-10  
421 generations (‘transfers’). At each transfer, cell count was determined using an Accuri c6 (BD  
422 Scientific) flow cytometer at high flow rate. Cells from the two species grown in co-culture  
423 could be distinguished based on the SSC (side scatter for granularity), FSC (forward scatter  
424 for cell size), and FL3 (red fluorescence for chlorophyll content) channels (Supporting Figure  
425 11), allowing for species growth curves to be tracked separately. To analyse differences in

426 cell sizes between treatments and species, we calibrated the flow cytometer with beads of  
427 known size.

428 Cell counts at the beginning and end of each transfer cycle were used to calculate the rate of  
429 increase in cell numbers and approximate generation times. Rates of increase in cell number  
430 were determined assuming logistic growth (based on pilot experiments), using the formula

$$431 \mu = (\ln(N_1) - \ln(N_0)) / dt \quad (1)$$

432 Where  $N_1$  is the cell count at the end, and  $N_0$  at the start of the transfer, and  $dt$  is the length of  
433 the transfer cycle (seven days).

434 The experiment was carried out for approximately 200 generations.

435

#### 436 **Reciprocal assays**

437 After 27 transfers in their respective selection environments, all samples were subjected to a  
438 full reciprocal transplant assay in all salinity and temperature regimes to test whether the  
439 surviving colonisers and invaders had adapted to the novel salinity in each temperature  
440 regime (Figure 1 B and C), and to calculate the magnitude of the short term and evolutionary  
441 responses (Figure 1B and C). A well-mixed sample from each surviving population was used  
442 to seed the assays. Assays were performed using the same inoculum size and duration of  
443 transfer cycle as during the selection experiment. The assays consisted of two transfers,  
444 where the first was used to allow the cultures to acclimate to the environment, and the second  
445 was used to measure the rate of increase in cell number as a proxy for fitness. Samples  
446 evolved at 22°C in their ancestral salinity in mono-culture were used as ‘evolved controls’,  
447 which take into account any evolution that may have occurred due to laboratory conditions  
448 *per se*.

449

450 We measured three types of responses: the short term response (occurring largely through  
451 rapid sorting and physiological acclimation within the same or a few generations, here, less  
452 than 10-14 generations), the long term response (likely largely evolutionary, > 100  
453 generations), and the correlated response (growth in environments other than the selection  
454 environment, 10-14 generations after termination of the long-term experiment). See e.g. [38]  
455 for calculation of the magnitude of short-and long term responses, as well as responses in the  
456 reciprocal environments.

457

458 **Experimental decomposition of populations grown and evolved in co-culture into mono-**  
459 **cultures**

460 To assess whether invaders evolved in co-culture had adapted to the novel salinity, the  
461 presence of the resident species, or both, we passed all co-cultured samples through a 5µm  
462 nitrocellulose filter, allowing *Ostreococcus* cells to pass, while *Chlamydomonas* cells  
463 remained on the filter, from which they could be rinsed off. Samples were then inspected  
464 under the microscope and flow cytometric data was again used as above to ensure a good  
465 separation of the two species. Samples were grown for two transfers in both their evolved and  
466 their ancestral salinity (Figure 1D). We compared the increase in cell number when they were  
467 grown on their own after decomposition to when they were grown in co-culture or had been  
468 selected for growth in monoculture. For logistic reasons, samples were only assayed at the  
469 temperatures that they had evolved in and not across all temperatures. To measure the short-  
470 term acclimation response to encountering another species, we re-created the starting  
471 conditions of the invasion experiment using mono-culture evolved samples (colonisers  
472 evolved in their ancestral salinity). These samples were inoculated to recreate the invasion  
473 from rare scenario as described above. The new co-cultures were maintained for two cycles,



474 and then separated again by filtration afterwards. This tested for whether dependence on the  
475 species was established within very few generations (Supporting Figure 6).

476

#### 477 **Characterisation of net primary production**

478 To characterise phenotypic changes in the different treatments, we gathered data on cell size  
479 and chlorophyll through flow cytometry (Accuri B6), and measured rates of oxygen evolution  
480 and consumption using a 24-channel PreSens Sensor Dish Reader. For all phenotypic  
481 characterisations, samples were harvested during exponential growth. The reader was placed  
482 in the incubator at assay temperature in a manner such that the light gradient across the reader  
483 plate was minimal ( $<5 \mu\text{E m}^{-2} \text{s}^{-1}$ ). Glass vials were filled to 1.2 mL with the respective  
484 sample, i.e. colonisers, invaders, or decomposed samples, covered with para-film and sealed  
485 tight. The samples were then left in the dark for 35 minutes, and gently inverted before  
486 measurements of oxygen evolution at the light level in the incubator for 5 minutes, and  
487 measurements of oxygen consumption in the dark for another 5 minutes. A vial containing  
488 filtered Bold's medium or f/2 medium at the appropriate salinity was used to account for any  
489 drift in the oxygen measurements. Cell count was determined using a flow cytometer as  
490 described above. The rates of oxygen evolution and consumption were then calculated per  
491 unit biomass, assuming spherical cells and carbon conversion factors after [71] (Supporting  
492 Figure 12 and Supporting Tables 16 and 17 for effects of selection regimes on biomass).

493

#### 494 **Nile Red stain**

495 A Nile Red stain was used as a proxy to determine relative quantities of intracellular polar  
496 and neutral lipids [72]. It works well for *Ostreococcus* [73] and while stains of the BODIPY  
497 class are preferred for quantification of lipids in *Chlamydomonas*, Nile Red can serve well to  
498 establish relative differences[74]. The dye was added to each 200  $\mu\text{L}$  sample on a 9-well plate

499 for a final concentration 15  $\mu$ M and left to incubate in the dark for 30 min, as pilot trials had  
500 shown that after this, fluorescence levels were stable long enough for the time taken  
501 to measure one 96 well plate. As Nile Red excites in the same wavelength as chlorophyll  
502 (FL3) and chlorophyll derivatives (FL2), samples were measured before and after adding the  
503 dye, and the chlorophyll fluorescence subtracted from the fluorescence obtained after staining  
504 the sample (Supporting Figure 9).

505

#### 506 **ROS assay**

507 We tested how capable samples were of detoxifying harmful reactive oxygen species (ROS)  
508 and also estimated the intra-cellular ROS levels in order to gain an estimate on whether  
509 samples under unfavourable conditions experience more stress, and are therefore producing  
510 more/ being less able to detoxify ROS. We used the protocols established by [54,62].  
511 Samples from ‘unfavourable environments’ had higher intra-cellular ROS content, were less  
512 well able to detoxify harmful ROS (Supporting Figures 2,3, 11).

513

#### 514 **Statistical analyses**

515 All data were analysed in R versions 3.3.1 and 3.3.3 [75].

#### 516 **Survival analysis**

517 We first analysed the extinction dynamics by performing a survival analysis using a Cox  
518 proportional hazards regression model with the R package ‘survival’(Supporting Table 1 and  
519 2). The model included biotic regime, temperature regime, and species as fixed effects.  
520 Biological replicate strains (per species) were treated as random effects. We also included a  
521 censor variable for populations that had not gone extinct by the end of the experiment. Note  
522 that an extinction event here was defined as cell numbers of a population declining below the

523 detection limit of the flow cytometer. We treat extinction as an event occurring on the  
524 replicate level in each individual treatment.

525 **Analysis of short-and long-term responses to changes in salinity, in stable and**  
526 **fluctuating temperatures**

527 We analysed the growth of the surviving replicates as assayed at the end of the experiment in  
528 the reciprocal transplants using analyses of variance within a mixed effects model (package  
529 nlme, version 3.1-131). Growth relative to growth of the evolved control at 22°C in  
530 monoculture was the response variable. This normalisation by growth under standard  
531 laboratory conditions allows us to correct for evolution occurring merely due to selection for  
532 laboratory conditions and further creates a baseline for easy comparison of the selection  
533 temperatures in relation to each other. We fitted the following fixed factors in the global  
534 model: species (*Chlamydomonas* or *Ostreococcus*), biotic regime (invading or colonising),  
535 selection temperature (22°C, 26°C, 32°C, or fluctuating), and response type ('short' for growth  
536 rates in the novel salinity after two weeks of culturing in the novel salinity, 'long' for growth  
537 rates in the novel salinity after evolution in the novel salinity, 'back' for growth rates in the  
538 ancestral salinity after evolution in the novel salinity). The ancestral and selection salinities  
539 can be inferred from the species and biotic regime factors, and therefore selection salinity  
540 was not added as an explicit factor. Replicates (Supporting Table 1 for number of surviving  
541 replicates in each unique treatment) nested within 'unique treatment' were used as random  
542 factors. The nesting was necessary as all replicates originally came from the same starting  
543 culture, i.e. replicate 1 of any given treatment was not more or less related to replicate 1 in  
544 another treatment than it was to, e.g., replicate 5. We ran the model only on samples where  
545 the assay temperature was identical to the selection temperature. We started the model with  
546 the fixed factors in full interaction, and searched for the model with the lowest AICc scores  
547 through the 'dredge' function within the MuMIn package (version 1.40.4). The model with

548 the lowest AICc was consequently used. In all cases of model selection by AICc, we used a  
549 delta value of  $> 2$  to confirm the best model (Supporting Tables 5 and 6).

550

### 551 **Analysis of local adaptation to temperature**

552 To specifically test whether samples had locally adapted to their selection temperature  
553 without risking over parameterising the mixed model, we built a separate mixed effects  
554 model using data where the assay salinity was the same as the selection salinity, thus  
555 focusing on the temperature dependence of growth rates in the samples' selection salinity.  
556 We used growth rates relative to the evolved control in mono-culture at 22°C as the response  
557 variable, and species (*Chlamydomonas* or *Ostreococcus*), biotic regime (invading or  
558 colonising), selection temperature (22°C, 26°C, 32°C, or fluctuating), and assay temperature  
559 (22°C, 26°C, 32°C, or fluctuating) as fixed factors. The random factors and model fitting were  
560 as described above (Supporting Tables 7 and 8).

561

### 562 **Analysis of growth rates in decomposed samples**

563 To analyse whether invaders and residents developed a dependence on each other in the  
564 short-term, we compared growth rates of the decomposed samples (decomposition after two  
565 weeks of co-culture ) to growth rates of the same species at the same temperature and salinity  
566 in mono-culture *via* a t-test (Supporting Table 15). For the long term-responses, we analysed  
567 the decomposed samples (measured at selection temperature) by fitting a mixed model, using  
568 the ratio between growth rates of either species after decomposition and growth rates of the  
569 species in co-culture as the response variable. We fitted species (*Chlamydomonas* or  
570 *Ostreococcus*), biotic interaction during selection(resident or invader) and selection  
571 temperature as the fixed effects. Random effects and model fitting were as described above  
572 (Supporting Tables 11 and 12).

573

## 574 **Phenotypic characterisation**

575 In order to estimate the effect of the selection regimes (biotic scenarios, temperature, and  
576 salinity) on cell size and total biomass we fitted a mixed model with the full interaction of the  
577 parameters species (*Chlamydomonas* or *Ostreococcus*), assay salinity ('home' for the assay  
578 salinity being equal to the focal species' selection salinity, and 'away' for assay salinity being  
579 different from the focal species' selection salinity), biotic regime (invading or colonising) and  
580 selection temperature (22°C, 26°C, 32°C, fluctuating). Model fitting and selection proceeded  
581 as described above (Supporting Tables 9 and 10 for size, Supporting Tables 16 and 17 for  
582 biomass). For the analysis of rates of net primary production in the evolved and decomposed  
583 samples specifically, a mixed model was fitted using species (*Chlamydomonas* or  
584 *Ostreococcus*), 'previous interaction' (invader or resident), assay salinity (including a unique  
585 identifier for each salinity in interaction with whether the sample had been decomposed and  
586 at which point in time – after 2 weeks, or at the end of the experiment – it had been  
587 decomposed, Fig. 1D for an example), selection temperature (22°C, 26°C, 32°C, fluctuating),  
588 'biotic selection regime' (colonisers or invaders) as the fixed effects. Model fitting and  
589 selection then proceeded as described above (Supporting Tables 13 and 14).

590

## 591 **References**

592

- 593 1. Seebens, H. et al. 2017 No saturation in the accumulation of alien species worldwide.  
594 *Nature Communications* **8**, 14435. (doi:10.1038/ncomms14435)
- 595 2. Mellin, C., Lurgi, M., Matthews, S., MacNeil, M. A., Caley, M. J., Bax, N.,  
596 Przeslawski, R. & Fordham, D. A. 2016 Forecasting marine invasions under climate  
597 change: Biotic interactions and demographic processes matter. *BIOC* **204**, 459–467.
- 598 3. Walther, G.-R. et al. 2009 Alien species in a warmer world: risks and opportunities.  
599 *Trends in Ecology & Evolution* **24**, 686–693. (doi:10.1016/j.tree.2009.06.008)
- 600 4. Li, S.-P., Tan, J., Yang, X., Ma, C. & Jiang, L. 2018 Niche and fitness differences  
601 determine invasion success and impact in laboratory bacterial communities. *The ISME*  
602 *Journal*, 1–11. (doi:10.1038/s41396-018-0283-x)

- 603 5. Faillace, C. A. & Morin, P. J. 2016 Evolution alters the consequences of invasions in  
604 experimental communities. *Nature Publishing Group* **1**, 1–6. (doi:10.1038/s41559-  
605 016-0013)
- 606 6. Faillace, C. A. & Morin, P. J. 2019 Evolution alters post-invasion temporal dynamics  
607 in experimental communities. *The Journal of Animal Ecology* **89**, 285–298.  
608 (doi:10.1111/1365-2656.13113)
- 609 7. West-Eberhard, M. J. 2003 *Developmental plasticity and evolution*. Oxford University  
610 Press.
- 611 8. Elena, S. F. & Lenski, R. E. 2003 Evolution experiments with microorganisms: the  
612 dynamics and genetic bases of adaptation. *Nat Rev Genet* **4**, 457–469.
- 613 9. Lenski, R. E. 2017 Experimental evolution and the dynamics of adaptation and  
614 genome evolution in microbial populations. 1–14. (doi:10.1038/ismej.2017.69)
- 615 10. Rengefors, K., Kremp, A., Reusch, T. B. H. & Wood, A. M. 2017 Genetic diversity  
616 and evolution in eukaryotic phytoplankton: revelations from population genetic  
617 studies. *Journal of Plankton Research* **60**, 24–15. (doi:10.1093/plankt/fbw098)
- 618 11. Collins, S., Rost, B. & Rynearson, T. A. 2013 Evolutionary potential of marine  
619 phytoplankton under ocean acidification. *Evolutionary Applications* **7**, 140–155.  
620 (doi:10.1111/eva.12120)
- 621 12. Listmann, L., LeRoch, M., Schluter, L., Thomas, M. K. & Reusch, T. B. H. 2016 Swift  
622 thermal reaction norm evolution in a key marine phytoplankton species. *Evolutionary  
623 Applications* **9**, 1156–1164. (doi:10.1111/eva.12362)
- 624 13. Schluter, L., Lohbeck, K. T., Gutowska, M. A., Groger, J. P., Riebesell, U. & Reusch,  
625 T. B. H. 2014 Adaptation of a globally important coccolithophore to ocean warming  
626 and acidification. *Nature Climate Change* **4**, 1024–1030. (doi:10.1038/nclimate2379)
- 627 14. Schaum, C. E. & Collins, S. 2014 Plasticity predicts evolution in a marine alga.  
628 *Proceedings of the Royal Society B: Biological Sciences* **281**, 20141486–20141486.  
629 (doi:10.1098/rspb.2014.1486)
- 630 15. Lohbeck, K. T., Riebesell, U. & Reusch, T. B. H. 2012 Adaptive evolution of a key  
631 phytoplankton species to ocean acidification. *Nature Geoscience* **5**, 346–351.  
632 (doi:10.1038/ngeo1441)
- 633 16. Wolf, K. K. E., Romanelli, E., Rost, B., John, U., Collins, S., Weigand, H. & Hoppe,  
634 C. J. M. 2019 Company matters: The presence of other genotypes alters traits and  
635 intraspecific selection in an Arctic diatom under climate change. *Global Change Biol*  
636 **25**, 2869–2884. (doi:10.1111/gcb.14675)
- 637 17. Wolf, K. K. E., Hoppe, C. J. M. & Rost, B. 2017 Resilience by diversity: Large  
638 intraspecific differences in climate change responses of an Arctic diatom. *Limnol.  
639 Oceanogr.* **53**, 27–15. (doi:10.1002/lno.10639)
- 640 18. Scheinin, M., Riebesell, U., Rynearson, T. A., Lohbeck, K. T. & Collins, S. 2015  
641 Experimental evolution gone wild. *Journal of The Royal Society Interface* **12**,

- 642 20150056–20150056. (doi:10.1098/rsif.2015.0056)
- 643 19. Schaum, C.-E. et al. 2017 Adaptation of phytoplankton to a decade of experimental  
644 warming linked to increased photosynthesis. *Nature Publishing Group* **1**, 1–7.  
645 (doi:10.1038/s41559-017-0094)
- 646 20. Rozen, D. E. & Lenski, R. E. 2000 Long-Term Experimental Evolution in *Escherichia*  
647 *coli*. VIII. Dynamics of a Balanced Polymorphism. *The American Naturalist* **155**, 24–  
648 35. (doi:10.1086/303299)
- 649 21. Burson, A., Stomp, M., Greenwell, E., Grosse, J. & Huisman, J. 2018 Competition for  
650 nutrients and light: testing advances in resource competition with a natural  
651 phytoplankton community. *Ecology* **99**, 1108–1118. (doi:10.1002/ecy.2187)
- 652 22. Tilman, D. 1977 Resource Competition between Plankton Algae: An Experimental  
653 and Theoretical Approach. *Ecology* **58**, 338–348. (doi:10.2307/1935608)
- 654 23. Ji, X., Verspagen, J. M. H., Stomp, M. & Huisman, J. 2017 Competition between  
655 cyanobacteria and green algae at low versus elevated CO<sub>2</sub>: who will win, and why?  
656 *Journal of Experimental Botany* **68**, 3815–3828. (doi:10.1093/jxb/erx027)
- 657 24. Follows, M. J., Follows, M. J., Dutkiewicz, S., Dutkiewicz, S., Grant, S., Grant, S.,  
658 Chisholm, S. W. & Chisholm, S. W. 2007 Emergent Biogeography of Microbial  
659 Communities in a Model Ocean. *Science* **315**, 1843–1846.  
660 (doi:10.1126/science.1138544)
- 661 25. Hesse, E., O'Brien, S., Tromas, N., Bayer, F., Luján, A. M., van Veen, E. M.,  
662 Hodgson, D. J. & Buckling, A. 2017 Ecological selection of siderophore-producing  
663 microbial taxa in response to heavy metal contamination. *Ecol Lett* **26**, 32–11.  
664 (doi:10.1111/ele.12878)
- 665 26. Ponomarova, O. & Patil, K. R. 2015 Metabolic interactions in microbial communities:  
666 untangling the Gordian knot. *Current Opinion in Microbiology* **27**, 37–44.  
667 (doi:10.1016/j.mib.2015.06.014)
- 668 27. Morris, J. J., Lenski, R. E. & Zinser, E. R. 2012 The Black Queen Hypothesis:  
669 Evolution of Dependencies through Adaptive Gene Loss. *mBio* **3**, 379.  
670 (doi:10.1128/mBio.00036-12)
- 671 28. Snell-Rood, E., Cothran, R., Espeset, A., Jeyasingh, P., Hobbie, S. & Morehouse, N. I.  
672 2015 Life-history evolution in the anthropocene: effects of increasing nutrients on  
673 traits and trade-offs. *Evolutionary Applications* **8**, 635–649. (doi:10.1111/eva.12272)
- 674 29. Fussmann, G. F., LOREAU, M. & ABRAMS, P. A. 2007 Eco-evolutionary dynamics  
675 of communities and ecosystems. *Funct Ecol* **21**, 465–477. (doi:10.1111/j.1365-  
676 2435.2007.01275.x)
- 677 30. Loeuille, N. 2010 Influence of evolution on the stability of ecological communities.  
678 *Ecol Lett* **13**, 1536–1545. (doi:10.1111/j.1461-0248.2010.01545.x)
- 679 31. Barraclough, T. G. 2015 How Do Species Interactions Affect Evolutionary Dynamics  
680 Across Whole Communities? *Annu. Rev. Ecol. Evol. Syst.* **46**, 25–48.

- 681 (doi:10.1146/annurev-ecolsys-112414-054030)
- 682 32. Collins, S. 2016 Growth rate evolution in improved environments under Prodigal Son  
683 dynamics. *Evolutionary Applications* **9**, 1179–1188. (doi:10.1111/eva.12403)
- 684 33. Brennan, G. L., Colegrave, N. & Collins, S. 2017 Evolutionary consequences of  
685 multidriver environmental change in an aquatic primary producer. *Proc. Natl. Acad.*  
686 *Sci. U.S.A.* **114**, 9930–9935. (doi:10.1073/pnas.1703375114)
- 687 34. Lachapelle, J., Bell, G. & Colegrave, N. 2015 Experimental adaptation to marine  
688 conditions by a freshwater alga. *Evolution* **69**, 2662–2675. (doi:10.1111/evo.12760)
- 689 35. Heath, S. E. & Collins, S. 2016 Mode of resistance to viral lysis affects host growth  
690 across multiple environments in the marine picoeukaryote *Ostreococcus tauri*.  
691 *Environmental Microbiology* **18**, 4628–4639. (doi:10.1111/1462-2920.13586)
- 692 36. Bell, G. & Gonzalez, A. 2011 Adaptation and Evolutionary Rescue in Metapopulations  
693 Experiencing Environmental Deterioration. *Science* **332**, 1327–1330.  
694 (doi:10.1126/science.1203105)
- 695 37. Ketola, T. & Hiltunen, T. 2014 Rapid evolutionary adaptation to elevated salt  
696 concentrations in pathogenic freshwater bacteria *Serratia marcescens*. *Ecol Evol* **4**,  
697 3901–3908. (doi:10.1002/ece3.1253)
- 698 38. Schaum, C. E. 2018 Enhanced biofilm formation aids adaptation to extreme warming  
699 and environmental instability in the diatom *Thalassiosira pseudonana* and its associated  
700 bacteria. *Limnol. Oceanogr.* **3**, e1601475–20. (doi:10.1002/lno.11050)
- 701 39. Lenski, R. E. 2017 What is adaptation by natural selection? Perspectives of an  
702 experimental microbiologist. *PLoS Genet* **13**, e1006668–12.  
703 (doi:10.1371/journal.pgen.1006668)
- 704 40. Ashander, J., Chevin, L.-M. & Baskett, M. L. 2016 Predicting evolutionary rescue via  
705 evolving plasticity in stochastic environments. *Proceedings of the Royal Society B:*  
706 *Biological Sciences* **283**, 20161690–10. (doi:10.1098/rspb.2016.1690)
- 707 41. Dutkiewicz, S., Morris, J. J., Follows, M. J., Scott, J., Levitan, O., Dyrman, S. T. &  
708 Berman-Frank, I. 2015 Impact of ocean acidification on the structure of future  
709 phytoplankton communities. *Nature Climate Change* **5**, 1002–1006.  
710 (doi:10.1038/nclimate2722)
- 711 42. Beckmann, A., Schaum, C.-E. & Hense, I. 2019 Phytoplankton adaptation in  
712 ecosystem models. *Journal of Theoretical Biology* **468**, 60–71.  
713 (doi:10.1016/j.jtbi.2019.01.041)
- 714 43. Denman, K. L. 2017 A Model Simulation of the Adaptive Evolution through Mutation  
715 of the Coccolithophore *Emiliania huxleyi* Based on a Published Laboratory Study.  
716 *Front. Mar. Sci.* **3**, 487. (doi:10.3389/fmars.2016.00286)
- 717 44. Bestion, E., Barton, S., García, F. C., Warfield, R. & Yvon-Durocher, G. 2020 Abrupt  
718 declines in marine phytoplankton production driven by warming and biodiversity loss  
719 in a microcosm experiment. *Ecol Lett* **23**, 457–466. (doi:10.1111/ele.13444)



- 720 45. Collins, S. & Schaum, C.-E. 2019 Diverse strategies link growth rate and competitive  
721 ability in phytoplankton responses to changes in CO<sub>2</sub> levels. *bioRxiv*,  
722 651471.
- 723 46. Mousing, E. A., Richardson, K., Bendtsen, J., Cetinić, I. & Perry, M. J. 2016 Evidence  
724 of small-scale spatial structuring of phytoplankton alpha- and beta-diversity in the  
725 open ocean. *J Ecology* **104**, 1682–1695. (doi:10.1111/1365-2745.12634)
- 726 47. Bertos-Fortis, M., Farnelid, H. M., Lindh, M. V., Casini, M., Andersson, A., Pinhassi,  
727 J. & Legrand, C. 2016 Unscrambling Cyanobacteria Community Dynamics Related to  
728 Environmental Factors. *Front. Microbiol.* **7**, 161–14. (doi:10.3389/fmicb.2016.00625)
- 729 48. Godhe, A. et al. 2016 Physical barriers and environmental gradients cause spatial and  
730 temporal genetic differentiation of an extensive algal bloom. *J. Biogeogr.* **43**, 1130–  
731 1142. (doi:10.1111/jbi.12722)
- 732 49. Larson, C. A. & Belovsky, G. E. 2013 Salinity and nutrients influence species richness  
733 and evenness of phytoplankton communities in microcosm experiments from Great  
734 Salt Lake, Utah, USA. *Journal of Plankton Research* **35**, 1154–1166.  
735 (doi:10.1093/plankt/fbt053)
- 736 50. Rengefors, K., Logares, R., Laybourn-Parry, J. & Gast, R. J. 2014 Evidence of  
737 concurrent local adaptation and high phenotypic plasticity in a polar microeukaryote.  
738 *Environmental Microbiology* **17**, 1510–1519. (doi:10.1111/1462-2920.12571)
- 739 51. Godhe, A. & Rynearson, T. 2017 The role of intraspecific variation in the ecological  
740 and evolutionary success of diatoms in changing environments. *Philos. Trans. R. Soc.*  
741 *Lond., B, Biol. Sci.* **372**, 20160399–10. (doi:10.1098/rstb.2016.0399)
- 742 52. Latta, L. C., Weider, L. J., Colbourne, J. K. & Pfrender, M. E. 2012 The evolution of  
743 salinity tolerance in *Daphnia*: a functional genomics approach. *Ecol Lett* **15**, 794–802.  
744 (doi:10.1111/j.1461-0248.2012.01799.x)
- 745 53. Shuryak, I. & Brenner, D. J. 2009 A model of interactions between radiation-induced  
746 oxidative stress, protein and DNA damage in *Deinococcus radiodurans*. *Journal of*  
747 *Theoretical Biology* **261**, 305–317. (doi:10.1016/j.jtbi.2009.08.003)
- 748 54. Lindberg, R. T. & Collins, S. 2019 Quality-quantity tradeoffs drive functional trait  
749 evolution in a model microalgal ‘climate change winner’. *bioRxiv* **8**, 4292–29.  
750 (doi:10.1101/819326)
- 751 55. Sriswasdi, S., Yang, C.-C. & Iwasaki, W. 2017 Generalist species drive microbial  
752 dispersion and evolution. *Nature Communications*, 1–8. (doi:10.1038/s41467-017-  
753 01265-1)
- 754 56. Mellin, C., Lurgi, M., Matthews, S., MacNeil, M. A., Caley, M. J., Bax, N.,  
755 Przeslawski, R. & Fordham, D. A. 2016 Forecasting marine invasions under climate  
756 change: Biotic interactions and demographic processes matter. *BIOC*, 1–9.  
757 (doi:10.1016/j.biocon.2016.11.008)
- 758 57. Verges, A. et al. 2014 The tropicalization of temperate marine ecosystems: climate-  
759 mediated changes in herbivory and community phase shifts. *Proceedings of the Royal*

- 760 *Society B: Biological Sciences* **281**, 20140846–20140846.  
761 (doi:10.1098/rspb.2014.0846)
- 762 58. Vergés, A. et al. 2016 Long-term empirical evidence of ocean warming leading to  
763 tropicalization of fish communities, increased herbivory, and loss of kelp. *Proceedings*  
764 *of the National Academy of Sciences* **113**, 13791–13796.
- 765 59. Marañón, E. 2015 Cell Size as a Key Determinant of Phytoplankton Metabolism and  
766 Community Structure. *Annu. Rev. Marine. Sci.* **7**, 241–264. (doi:10.1146/annurev-  
767 marine-010814-015955)
- 768 60. Brown, J. H., Gillooly, J. F., Allen, A. P., Van M Savage & West, G. B. 2004 Toward  
769 A Metabolic Theory Of Ecology. *Ecology* **85**, 1771–1789. (Doi:10.1890/03-9000)
- 770 61. Malerba, M. E., Palacios, M. M., Palacios Delgado, Y. M., Beardall, J. & Marshall, D.  
771 J. 2018 Cell size, photosynthesis and the package effect: an artificial selection  
772 approach. *New Phytol* **219**, 449–461. (doi:10.1111/nph.15163)
- 773 62. Malerba, M. E. & Marshall, D. J. 2019 Testing the drivers of the temperature–size  
774 covariance using artificial selection. *Evolution* **74**, 169–178. (doi:10.1111/evo.13896)
- 775 63. Key, T., McCarthy, A., Campbell, D. A., Six, C., Roy, S. & Finkel, Z. V. 2010 Cell  
776 size trade-offs govern light exploitation strategies in marine phytoplankton.  
777 *Environmental Microbiology* **12**, 95–104. (doi:10.1111/j.1462-2920.2009.02046.x)
- 778 64. Wisser, M. J., Ribbeck, N. & Lenski, R. E. 2013 Long-Term Dynamics of Adaptation in  
779 Asexual Populations. *Science* **342**, 1364–1367. (doi:10.1126/science.1243357)
- 780 65. Burke, M. K., Liti, G. & Long, A. D. 2014 Standing Genetic Variation Drives  
781 Repeatable Experimental Evolution in Outcrossing Populations of *Saccharomyces*  
782 *cerevisiae*. *Molecular Biology and Evolution* **31**, 3228–3239.  
783 (doi:10.1093/molbev/msu256)
- 784 66. Fussmann, K. E., Schwarzmüller, F., BROSE, U., Jousset, A. & Rall, B. C. 2014  
785 Ecological stability in response to warming. *Nature Climate Change* **4**, 206–210.  
786 (doi:10.1038/nclimate2134)
- 787 67. Gravel, D., Bell, T., Barbera, C., Bouvier, T., Pommier, T., Venail, P. & Mouquet, N.  
788 2010 Experimental niche evolution alters the strength of the diversity-productivity  
789 relationship. *Nature* **469**, 89–92. (doi:10.1038/nature09592)
- 790 68. Urban, M. C. 2013 Evolution mediates the effects of apex predation on aquatic food  
791 webs. *Proceedings of the Royal Society B: Biological Sciences* **280**, 20130859–  
792 20130859. (doi:10.1098/rspb.2013.0859)
- 793 69. Keller, M. D., Selvin, R. C., Claus, W. & Guillard, R. R. L. 1987 Media for the  
794 Culture of Oceanic Ultraphytoplankton. *Journal of Phycology* **23**, 633–638.  
795 (doi:10.1111/j.1529-8817.1987.tb04217.x)
- 796 70. Elena, S. F. & Lenski, R. E. 2003 Evolution experiments with microorganisms: the  
797 dynamics and genetic bases of adaptation. *Nat Rev Genet* **4**, 457–469.

- 798 71. Montagnes, D. J. S., Berges, J. A., Harrison, P. J. & Taylor, F. J. R. 1994 Estimating  
799 carbon, nitrogen, protein, and chlorophyll a from volume in marine phytoplankton.  
800 *Limnol. Oceanogr.* **39**, 1044–1060. (doi:10.4319/lo.1994.39.5.1044)
- 801 72. Guzmán, H. M., la Jara Valido, de, A., Duarte, L. C. & Presmanes, K. F. 2009  
802 Estimate by means of flow cytometry of variation in composition of fatty acids from  
803 *Tetraselmis suecica* in response to culture conditions. *Aquacult Int* **18**, 189–199.  
804 (doi:10.1007/s10499-008-9235-1)
- 805 73. Schaum, C.-E., Rost, B. O. R. & Collins, S. E. A. 2015 Environmental stability affects  
806 phenotypic evolution in a globally distributed marine picoplankton. *The ISME Journal*,  
807 1–10. (doi:10.1038/ismej.2015.102)
- 808 74. Kou, Z., Bei, S., Sun, J. & Pan, J. 2013 Fluorescent measurement of lipid content in  
809 the model organism *Chlamydomonas reinhardtii*. *J Appl Phycol* **25**, 1633–1641.  
810 (doi:10.1007/s10811-013-0011-x)
- 811 75. R 2015 Development Core Team, R: A language and environment for statistical  
812 computing. R Foundation for Statistical Computing, Vienna, Austria. ISBN 3-900051-  
813 07-0.
- 814
